1

2

3

4

5

6

7

## **Micrometer-resolution reconstruction and analysis of whole mouse brain vasculature by synchrotron-based phase-contrast tomographic microscopy**

8

9

10 Arttu Miettinen<sup>1,2,\*^</sup>, Antonio G. Zippo<sup>3,^</sup>, Alessandra Patera<sup>2,#</sup>, Anne Bonnin<sup>2</sup>, Sarah H. Shahmoradian<sup>4</sup>,  
11 Gabriele E. M. Biella<sup>3</sup> and Marco Stampanoni<sup>1,2</sup>

12

1. Institute for Biomedical Engineering, University and ETH Zurich, Zurich, Switzerland

13

2. Swiss Light Source, Paul Scherrer Institute, Villigen, Switzerland

14

3. Institute of Neuroscience, Consiglio Nazionale delle Ricerche, Milan, Italy

15

4. Center for Cellular Imaging and NanoAnalytics (C-CINA), Biozentrum, University of Basel, Switzerland

16

17

\* Present address of the author is Department of Physics, University of Jyväskylä, Jyväskylä, Finland

18

19

# Present address of the author is National Institute of Nuclear Physics INFN, Turin, Italy

20

^ Corresponding authors: Arttu Miettinen ([arttu.i.miettinen@jyu.fi](mailto:arttu.i.miettinen@jyu.fi)), Antonio G. Zippo

21

([antonio.zippo@in.cnr.it](mailto:antonio.zippo@in.cnr.it)). Both corresponding authors contributed equally to this work.

22

23

## 24 **Abstract**

25 Nervous tissue metabolism is mainly supported by the dense thread of blood vessels which mainly provides  
26 fast supplies of oxygen and glucose. Recently, the supplying role of the brain vascular system has been  
27 examined in major neurological conditions such as the Alzheimer's and Parkinson's diseases. However, to date,  
28 fast and reliable methods for the fine level microstructural extraction of whole brain vascular systems are still  
29 unavailable. We present a methodological framework suitable for reconstruction of the whole mouse brain  
30 cerebral microvasculature by X-ray tomography with the unprecedented pixel size of 0.65  $\mu\text{m}$ . Our  
31 measurements suggest that the resolving power of the technique is better than in many previous studies, and  
32 therefore it allows for a refinement of current measurements of blood vessel properties. Relevant insights  
33 emerged from analyses characterizing the regional morphology and topology of blood vessels. Specifically,  
34 vascular diameter and density appeared non-homogeneously distributed among the brain regions suggesting  
35 preferential sites for high-demanding metabolic requirements. Also, topological features such as the vessel  
36 branching points were non-uniformly distributed among the brain districts indicating that specific architectural  
37 schemes are required to serve the distinct functional specialization of the nervous tissue. In conclusion, here  
38 we propose a combination of experimental and computational method for efficient and fast investigations of  
39 the vascular system of entire organs with submicrometric precision.

40

## 41 **1. Introduction**

42 Cerebral blood vessels sustain neuronal activity by providing metabolic components and oxygen to the brain  
43 tissues and by removing catabolic waste products. Specifically, it has been estimated that in humans and  
44 primates, synaptic activity and action potentials account for about 96% of the total energy consumed<sup>1</sup>, events  
45 enabled by a tight coupling among neuronal, glial and vascular cells. While much efforts have been spent to  
46 reconstruct in detail the sophisticated networks of specific neuronal circuits, no comparable achievements have  
47 solved the intricate microvascular architecture even in small nervous systems. Precise depiction of the vascular  
48 structure is also important for the comprehension of the biophysical mechanisms governing the crucial  
49 interplay among neurons, glial cells and blood vessels, a physiological event known as neuro-vascular  
50 coupling<sup>2</sup>.

51 The brain vascular structure is altered in many neurological diseases such as cerebrovascular diseases and  
52 various forms of Alzheimer's and Parkinson's diseases which constitute major health issues worldwide<sup>3</sup>. Many  
53 of these conditions are related to changes in the structure of the cerebral blood vessels, such as increased or  
54 decreased capillary density, microbleeds, stiffening of artery walls, or increase in vessel tortuosity<sup>4,5</sup>.

55 Reconstructing the structure of the whole vascular network in a brain is challenging as the whole brain is  
56 generally very large compared to the smallest microvessels. Two imaging techniques often applied to this  
57 purpose, in the context of mouse brain analyses, are magnetic resonance imaging<sup>6</sup> and light sheet microscopy<sup>7-  
58 9</sup>. In these techniques resolution and pixel size are however often closer to 10  $\mu\text{m}$  rather than 1  $\mu\text{m}$ , and usually  
59 too large to unveil the smallest microvessels that have diameters down to less than 5  $\mu\text{m}$ . On the other hand,  
60 X-ray tomographic microscopy (CT) offers higher resolution and the advantage of not requiring extensive  
61 sample preparation. Preparations such as tissue clearing increase the possibility of deformations in the sample,  
62 and their efficacy could vary spatially<sup>10,11</sup>.

63 Previously the cost of high resolution in CT was small sample size<sup>12</sup>. However, recent advances in imaging  
64 speed<sup>13,14</sup> and post-processing algorithms<sup>15</sup> allow for imaging of centimeter-scale samples in reasonable time  
65 (hours) with micrometer-scale resolution<sup>16</sup>. Notwithstanding, in all high-resolution imaging modalities capable  
66 of imaging large samples, the amount of image data to be analyzed and interpreted is very large, often in the

67 range of terabytes. The large data size highlights the need to choose analysis algorithms and techniques such  
68 that the image analysis process can be performed in a reasonable time. Particularly favorable are algorithms  
69 that can be parallelized and distributed across computer clusters. Recently there have been several proposals  
70 of analysis software that can be applied to brain analysis<sup>7,17,18</sup>. Most of these are not openly available to the  
71 whole scientific community, are in early stage of development, or are geared towards single technique or  
72 imaging modality.

73 In this work, we show that synchrotron-based phase-contrast tomographic microscopy can be advantageously  
74 used to image micro-vessels in the whole mouse brain. In our technique the microvessels were perfused with  
75 contrast agent (Indian Ink<sup>19</sup>) and fixed with formalin solution. The perfused sample was tomographically  
76 investigated in a mosaic imaging mode, and the individual tiles were combined into one large volume image  
77 of the whole brain using a non-rigid stitching algorithm<sup>15</sup>. A main advantage of the mosaic imaging mode is  
78 that slow deformations of the sample do not lead to imaging artifacts, in contrast with more traditional CT  
79 imaging techniques. Finally, the full 11 TB volume image was segmented and analyzed using an in-house  
80 developed and freely available software, capable of processing the images in a few days using a small computer  
81 cluster as detailed below in the Section 4.

82 From the volume images we generated a vascular graph consisting of vessel branches and bifurcation points.  
83 The graph embedded various information related to the topology and morphology of the microvessel branches,  
84 e.g. length and average diameter. Subsequently, we determined the anatomical regions corresponding to our  
85 blood vessel space by registration of the volume image to the Allen mouse brain atlas<sup>20</sup>. Eventually, we  
86 described the vascular anatomy of the brain in different anatomical regions using quantities such as  
87 microvessel tortuosity, bifurcation density, vessel length density, and intercapillary distance.

88

## 89 **2. Results**

### 90 **2.1 Sample preparation and imaging**

91 Whole-brain samples were prepared by intracardiac perfusion of the vascular system with Indian Ink,  
92 according to the protocol in <sup>19,21</sup>. The brain was then extracted and stored in polyphosphate buffered solution  
93 to maintain constant hydration until and during the data acquisition. The brain sample was CT imaged in a  
94 mosaic phase-contrast imaging mode where partially overlapping individual tomograms are taken side-by side  
95 to cover the whole volume of the brain. The tomograms were stitched into one large volume image using a  
96 non-rigid stitching algorithm<sup>15</sup> that accounts for small deformations of the overlapping regions. The  
97 dimensions of the final volume image were approximately  $13600 \times 13600 \times 30000$  pixels with a pixel size of  
98  $0.65 \mu\text{m}$ . Finally, the volume image was denoised and segmented using standard image analysis algorithms.

### 99 **2.2 Image quality**

100 Initially, the quality of the volume image and the segmentation was visually evaluated by several imaging  
101 specialists. The algorithmic segmentation was found to visually match most of vessels identifiable on the  
102 volume image, see Figure 1 and Supplementary Animations 1-3. In order to find a quantitative estimate of the  
103 quality of the segmentation, an operator compared 2000 blocks ( $30 \times 30 \times 30$  pixels each, from random locations)  
104 of the segmented image to the original. For each block, the operator determined whether there was a vessel in  
105 the block and whether it was segmented correctly. Confusion table (Supplementary Table 1) was calculated  
106 from operator's answers. The segmentation agreed with operator's perception of vesselness with sensitivity,  
107 specificity,  $F_1$ -score and Youden's J statistics of 0.943, 0.996, 0.960, and 0.939, respectively. Figure 1A-D  
108 shows various visualizations of the segmented microvessels.

109 Based on visual inspection of the blocks that were identified as badly segmented, the largest segmentation  
110 errors were found near large arteries and veins (diameters typically in the range of tens or hundreds of  
111 micrometers) that are not thoroughly perfused with the contrast agent (Indian Ink). We have not considered  
112 these vessels in the analysis. However, as shown by the statistics calculated from the confusion table, the  
113 number of such vessels is small compared to the microvessels, and therefore they do not contribute  
114 significantly to the results.

### 115 **2.3 Overall structure of microvessels**

116 In order to quantify the structure of individual microvessel branches, we found the centerline of each branch,  
117 and the bifurcation points of two or more branches. Additionally, we measured the length and the diameter of  
118 each branch.

119 We estimated the whole brain to contain approximately 4.3 million bifurcation points and 5.0 million vessel  
120 branches. Average bifurcation and length densities are  $11000 \pm 2000$  per  $\text{mm}^3$  and  $1.0 \pm 0.1$   $\text{m}/\text{mm}^3$ ,  
121 respectively (Figure 1E-F), where the reported error limits correspond to uncertainty caused by the image  
122 analysis processes. The estimated length densities are somewhat higher than most previously reported values  
123 that are in range  $[0.440, 0.922]$   $\text{m}/\text{mm}^3$ <sup>4,7,9,22,23</sup>. Previous data on bifurcation density reported<sup>7</sup> a value of  
124 approximately 3500 per  $\text{mm}^3$ . The larger densities encountered in this study suggest that the true resolving  
125 power of the analysis pipeline used here is higher than in most of the previous studies. Additionally, different  
126 decisions made while choosing whether multiple nearby bifurcation points represent single physical  
127 bifurcation might lead to varying estimates of bifurcation density. Length density did not suffer from such an  
128 ambiguity in its definition and its value agrees better with the previously reported ones.

129 For the first time, our results returned estimations of the whole-brain vascular length (295 m), and of the  
130 average vessel branch length ( $53 \pm 3$   $\mu\text{m}$ ) (Figure 1G) at the level of the single microvessels. Average vessel  
131 diameter was  $5.8 \pm 0.4$   $\mu\text{m}$  in the whole brain (Figure 1H). It is conveniently between previously reported  
132 values of  $4.25$   $\mu\text{m}$ <sup>22</sup> and  $8$   $\mu\text{m}$ <sup>7</sup>. The differences might be caused by various sample preparation routines such  
133 as perfusion and optical clearing. It was not certain that possible shrinkage or swelling of the vessels caused  
134 by these operations can be easily accounted for<sup>24</sup>, particularly when the focus is on local micro-scale properties  
135 and not on overall average deformation. In particular, any inaccuracy caused by local non-isotropic  
136 deformations are easily propagated to the results due to the small diameter of the vessels (in pixels,  $5.8$   $\mu\text{m} =$   
137  $8.9$  pixels). According to results in Figure 1L vessel diameter was almost constant in the longer branches but  
138 varied more in the shorter ones.

139 The length over diameter ratio ( $L/d$ , dimensionless length) is related to the pressure loss in the vessel through  
140 the Darcy–Weisbach equation. Large values of  $L/d$  indicate that the vessel is long and thin, and the flow  
141 resistance of the vessel is large. We found an average  $L/d$  value of  $11 \pm 1$  (Figure 1I) and largest values ranging  
142 to more than 100. The values indicate a large spectrum of putative flow resistance regimes<sup>25</sup>.

143 Tortuosity is a measure of how much a blood vessel segment twists, with high values typically related to  
144 pathologies<sup>26</sup>. Average tortuosity of the vessels was  $1.24 \pm 0.01$  (Figure 1J), a value which was maximized  
145 with 20-30  $\mu\text{m}$  length vessels and generally increases with the vessel length (Figure 1M). Further, tortuosity  
146 was highest in vessels of diameters between 5 to 7  $\mu\text{m}$  (Figure 1N), indicating that the purpose of the vessels  
147 in this size range is to assist in even transport of metabolic components and waste products to and from the  
148 tissue, in contrast to efficiently transferring them for long distances. The average distance the products must  
149 transport outside of blood vessels equals to the distance to the nearest microvessel, and that was measured to  
150 be  $15 \pm 1$   $\mu\text{m}$ . The value corresponds to approximately 2.5 average microvessel diameters (Figure 1K).

### 151 **2.4 Differences in the vascular structure between anatomical regions**

152 In order to obtain a more detailed picture of the structure of the vessel network, we co-registered the obtained  
153 mouse brain vessels with the Allen mouse brain atlas at the highest resolution of the atlas (100  $\mu\text{m}$  pixel size).  
154 In addition, we clustered the atlas brain regions into two different hierarchical groups such that very small  
155 regions were combined in order to guarantee that each clustered region contained statistically significant  
156 number of vessel branches. In the first (finer) level, we have 44 different regions (Supplementary table 1, left  
157 column, *regions*), and in the second coarser level 11 regions (Supplementary table 1, right column,  
158 *macroregions*).

159 We calculated the vessel measures in each region (Figure 2, Supplementary figure 1, Supplementary  
160 animations 4-11), and non-parametric Kruskal-Wallis test indicated that results for all the regions do not come  
161 from the same distribution ( $P < \text{machine precision}$ ). This was true for all the measures. In particular, the  
162 branch point density was statistically different among the macroregions (Figure 2B) and regions  
163 (Supplementary figure 1B) as well as the length density (Figures 2C, Supplementary figure 1C). The vessel  
164 length was non-uniformly distributed among macroregions (Figure 2D) and regions (Supplementary figure  
165 1D). Approximately 12% of all the vessel branches connected two or more anatomical regions, and the rest  
166 remained inside single region.

167 Post-hoc significant differences of the various measured quantities (Tukey tests, Supplementary files)  
168 composed a hierarchical descending order (*Hasse diagrams*<sup>27</sup>, Figure 3) for the macroregions, where  
169 statistically significantly different regions are placed on different levels of the hierarchy. These orderings  
170 highlighted the Ventral Striatum and the Isocortex as the macroregions with longest vessel branches and,  
171 oppositely, the White Matter and the Olfactory Bulb as the macroregions with shortest vessel branches. In  
172 terms of vessel diameters (Figures 2F and 3), the White Matter and the Olfactory Bulb were the macroregions  
173 with largest values and the Cerebellum, while the Brainstem and the Thalamus had the smallest vessel  
174 diameters. The L/d ratio pointed (Figures 2G and 3) the Hypothalamus and the Ventral Striatum as the  
175 macroregions with the highest values, the White Matter and the Olfactory Bulb were instead the macroregions  
176 with the smallest L/d ratio. The tortuosity reached the highest values (Figures 2H and 3) in the Thalamus and  
177 the Ventral Striatum while the smallest values were estimated in the White Matter and the Olfactory Bulb. The  
178 distance to the nearest vessel was highest (Figures 2I and 3) in the Cerebellum, the Brainstem, the Caudate  
179 Putamen and the White Matter. Conversely the distance reached the minimum values in the Isocortex, the  
180 Olfactory Bulb and the Thalamus.

181 We did similar analyses for the 44 finer anatomical regions (Supplementary figure 1). Remarkably, vessel  
182 lengths were longest in the Thalamus subregions and in the Extrapyrmidal Tract, and shortest in the Frontal  
183 Pole (Figure S14). Vessel diameter was largest in the Accessory Olfactory Bulb and in distinct White Matter  
184 regions (Optic Nerve, Corpus Callosum, Corticospinal Tract) while it was smallest in the Primary  
185 Somatosensory and Motor Cortices and the Retrosplenial Area (Figure S16). Eventually, the L/d ratio was  
186 greatest in the thalamic regions while the Frontal Pole, the Perirhinal Area the Olfactory Bulb, the Visceral  
187 and the Orbital Area were characterized by smaller values (Figure S17). In conclusion, geometrical,  
188 morphological and topological features of mouse brain microvessels appeared regionally specific suggesting  
189 distinct roles in support of local specialization of brain districts.

### 190 **3. Discussion**

191 The results highlighted peculiar characteristics of specific macroregions that were mainly the white matter, the  
192 olfactory bulb and the cerebellum but also the striatum and the somatosensory, motor and visual cortices,  
193 which appeared to get extreme values in our estimations. Indeed, we observed a strong correlation between  
194 the neuronal density<sup>28,29</sup> and the numbers of branch points and tortuosity (Figures 4A and K), a weaker but  
195 sustained correlation has been detected also with the distance to the nearest vessel (Figure 4N). In addition,

196 comparable and in some cases even stronger correlations held also in the glial cell density (Figure 4, third and  
197 fourth columns). Note that the estimations were biased by the zero neuronal density of white matter and,  
198 oppositely, by the high neuronal density of cerebellar layers (more than fivefold the average of other regions).  
199 Indeed, removing these two regions from the linear regressions results in stronger correlations between  
200 neuronal density and many of the measured quantities (Supplementary figure 2). Such postliminary  
201 considerations suggest that no trivial rules govern microvascular features in relation to the other existing  
202 cellular families (neurons and glia). Surprisingly, vessel tortuosity appeared to be the best predictor (as for  
203 linear regression) for neuronal density while the distance to the nearest vessels played the same role for glial  
204 density.

205 Besides density correlations, a reasonable observation was that typical high energy demanding regions were  
206 denser of vessels with long segments and small diameters. A set of neurophysiological and anatomical  
207 considerations supported the observed results. The brain white matter is mostly composed by myelinated  
208 neuronal axons and glial cells. From metabolic perspective, axonal segments demand (with the complicity of  
209 astrocytes<sup>30</sup>) approximately 3-fold lower energies than their terminals<sup>1,31</sup>, albeit these estimations have been  
210 calculated on the amount of mitochondrial ATP consumption. Accordingly, although authors reported that  
211 oligodendrocytes, abundantly populating white matter<sup>29</sup>, provide metabolic support to neurons through  
212 monocarboxylate transporters<sup>32,33</sup>, our results showed low vascular density in the white matter regions mostly  
213 characterized by the presence of large vessels in terms of diameter.

214 The olfactory bulbs are important districts for the olfactory information processing, crucial for rodent behavior  
215 and survival. The olfactory bulbs are the second neuron densest brain structure<sup>29</sup> (~250000 neurons per mm<sup>3</sup>).  
216 In olfactory bulbs tortuosity was very high (the second highest) indicating that vessels are highly twisted and  
217 curved. Vessels in this region were characterized by the highest branch point density, low segment length and  
218 large diameter.

219 The cerebellum is an evolutionary ancient three-layered brain section distinguished by the highest neuronal  
220 density of about 830000 neurons per mm<sup>3</sup>. As expected, our estimations showed that cerebellar vessels were  
221 the smallest in terms of diameter and one of the shortest according to segment length. Nonetheless, cerebellar  
222 vessels had the highest distance to nearest vessel among regions, an unexpected result which suggested that  
223 the ratio of vascular endothelial cells to the number of neurons is relatively low in comparison to other  
224 regions<sup>28</sup>.

225 The striatum is a subcortical region responsible for motor functions with a relatively low neuronal density<sup>28,29</sup>  
226 (~64000 neurons per mm<sup>3</sup>), and is generally divided in its ventral and dorsal (caudate putamen) parts. Ventral  
227 striatum (~66000 neurons per mm<sup>3</sup>) had the longest vascular segments and relatively low diameters,  
228 compatible with a moderate level of energy demand.

229 At last, the neocortex, which is responsible of most of high-level brain functions and is characterized by a  
230 moderate neuronal density (approximately 83000 neurons per mm<sup>3</sup>), did not stand out in any vascular feature.  
231 This result seems to be in accordance with recent 18FDG-PET measurements of the homogeneous metabolism  
232 of the mouse cerebral cortex among other hindbrain and forebrain structures<sup>34</sup>.

233 As a summary, we presented a methodological framework for comprehensive and precise reconstruction of  
234 the entire microvasculature of the mouse brain at the unprecedented pixel size of 0.65  $\mu\text{m}$ . Local synchrotron-  
235 based X-ray phase-contrast tomography combined with an attainable computational pipeline resulted in an  
236 effective methodology to investigate geometrical, morphological and topological features of vascular systems  
237 of *ex vivo* organs at their finest structure.

238 The approach proposed in this paper has a few limitations. First, the whole brain sample analyzed in this work  
239 was imaged in approximately 1200 tiles that required image acquisition session lasting more than 57 hours.  
240 Each tile was therefore imaged in approximately three minutes. The sample must be steadily mounted and  
241 stable such that during each three-minute interval it moves less than one pixel (0.65  $\mu\text{m}$ ), or otherwise the  
242 tomographic reconstructions of the individual tiles may contain artifacts. Although this requirement could still  
243 rise problems in various experimental setups, it is much easier to achieve than similar stability over the whole  
244 imaging session. Note that deformations between neighboring tiles are acceptable in the stitching method used  
245 here<sup>15</sup>. Second, the results shown here are based on a single animal and, although related literature does not  
246 indicate important variations in the brain microvascular architecture, conclusions of this work could be slightly  
247 different in a larger animal sample. Third, it seems to be hard to perfuse all vessels adequately with the  
248 proposed contrast agent (Indian Ink), and therefore the non-perfused vessel branches are missing from the  
249 analysis. This leads to biased results especially for the largest vessels, but according to results shown in  
250 Section 2 and Supplementary Table 1 the smaller vessels seem to be unaffected.

251 In the future, the methods proposed in this work can be used, e.g., to construct an atlas of microvessel geometry  
252 in mouse brain, both in healthy and pathological conditions, or to study blood flow in more detail using image-  
253 based flow simulations either in direct image-based modality<sup>35</sup> or using the generated vascular graph<sup>36</sup>. In  
254 conclusion, we demonstrated that it is possible to make high-quality tomographic images of very large, fragile,  
255 moisture- and radiation sensitive samples, and analyze their structure with image-based measurements. We  
256 believe that the methodology introduced here generalizes well to many kinds of biological and engineered  
257 samples, and is particularly useful in cases where optical clearing required in many other imaging modalities  
258 is not possible or desirable.

## 259 **4. Materials and Methods**

### 260 **Mouse sample preparation**

261 The experimental procedure was approved by the local veterinary authority of Canton Zürich, Switzerland  
262 (license number ZH184/2015).

263 After the loss of any reflex, before the death by the barbiturate overdose, the animals were prepared for the  
264 perfusion by the opening of the sternal plate and the thoracic cage. The beating heart was then gently clamped  
265 with flat tweezers and an 8-gauge metal needle with the smoothed tip was inserted into the left heart ventricle.  
266 The intracardiac perfusion was performed in a few stages: first with a Ca<sup>+</sup>/Mg<sup>+</sup>-free phosphate buffered saline  
267 (PBS) (100 ml, 37 °C), followed by a 4 % paraformaldehyde and Karnovsky's fixative (100 ml, 37 °C), and  
268 then perfused with Indian Ink (50 ml, 40 °C), and finally with Karnovsky's fixative (20 ml, 4 °C). A clear sign  
269 of the complete perfusion was the generalized blackening of all the mucosae, of nude skin surfaces (such as  
270 the snout, the paws) the thoracic viscera and the eyes.

271 Subsequently, the animals underwent euthanasia in order to extract the whole brain. The extracted brains were  
272 immersed in PBS solution and maintained in constant hydration conditions until and during the data  
273 acquisition.

274

### 275 **X-ray tomographic microscopy**

276 Samples were imaged at the TOMCAT beamline of the Swiss Light Source at Paul Scherrer Institute  
277 (Switzerland). The dataset consists of  $9 \times 9 \times 15$  tomograms of  $2048^3$  pixels each. The individual tomograms

278 form an image mosaic, where overlap between neighboring images is 30% of their diameter in directions  
279 perpendicular to the rotation axis, and approximately 10% in the direction parallel to the rotation axis.

280 Each tomogram was reconstructed from 1001 X-ray projection images with the GridRec algorithm<sup>37</sup>. Paganin  
281 phase retrieval method<sup>38</sup> was used before reconstruction. The projection images were acquired with 20 keV  
282 monochromatic X-ray beam, 0.65  $\mu\text{m}$  pixel size, and 50 ms exposure time. The sample to detector distance  
283 was set to 100 mm. The total acquisition time was approximately 57 h.

284

## 285 **Stitching**

286 We stitched the individual tomograms into one large volume image using a non-rigid stitching algorithm<sup>15</sup>.  
287 There, the locations and the orientations of the individual tomograms are globally optimized such that  
288 disagreements between them in the overlapping regions are minimized. Furthermore, the overlapping regions  
289 are deformed such that any remaining disagreements are eliminated. This processing ensures that the  
290 microvessels are continuous across boundaries of individual tomograms even in cases where the sample has  
291 deformed during image acquisition. The size of the stitched volume image was approximately  $13600 \times 13600$   
292  $\times 30000$  pixels (11 TB with 16-bit pixels).

293

## 294 **Registration to the Allen atlas**

295 The stitched volume image was downsampled to similar size than the annotated Allen adult brain atlas at its  
296 full resolution (version CCF 2017)<sup>20</sup>. The Atlas was then registered with the volume image, initially by an  
297 affine transformation, and further refined with a non-rigid B-spline transformation.

298

## 299 **Image segmentation**

300 The stitched volume image was denoised using bilateral filtering<sup>39,40</sup> (spatial  $\sigma = 1.3 \mu\text{m}$ , radiometric  $\sigma = 7.6\%$   
301 of full dynamic range), followed by high-pass filtering to remove large-scale intensity variations (spatial  $\sigma =$   
302  $6.5 \mu\text{m}$ ). The filtered image was segmented with a region-growing approach. To that end, initially all pixels  
303 whose value were above a threshold were classified as vessels. The vessel regions were grown until all  
304 bordering pixels had a value below a second threshold. All other pixels were classified as background. The  
305 threshold values were selected such that the segmentation visually corresponded to the vessels.

306 Possible gaps in the segmented vessels were eliminated by applying a morphological closing filter (radius =  
307  $3.25 \mu\text{m}$ ). In addition to blood vessels, the segmentation process identified choroid plexuses, some small and  
308 separate non-vessel regions, and many planar structures (at the surfaces of the brain, mostly caused by  
309 remaining phase contrast artifacts) as vessels. In order to eliminate the small non-vessel regions, all foreground  
310 objects less than  $685 \mu\text{m}^3$  (equivalent to 2500 pixels) in volume were discarded. As the blood vessels form a  
311 continuous network, this process does not have any effect on them. The choroid plexuses in the ventricular  
312 cavities were removed by masking the original segmentation with a mask where choroid plexuses were not  
313 visible. The mask was generated using morphological opening and closing operations.

314 Planar structures were eliminated by calculating a surface skeleton<sup>41</sup> of the foreground, and eliminating all  
315 surfaces consisting of more than 5000 pixels. The surface skeleton was then refined into a line skeleton<sup>41</sup> where  
316 each blood vessel is turned into a single pixel thick line located in the middle of the vessel.



317

## 318 **Image analysis**

319 The line skeleton was traced in order to produce a graph representation of the microvessel network. In the  
320 graph, vessel bifurcation points are represented as vertices and vessels as edges. The bifurcation points were  
321 found and the center lines between them, representing individual branches of the blood vessel network, were  
322 traced in order to produce a graph representation of the microvessel network. For each bifurcation point, the  
323 corresponding anatomical region was recorded based on the annotated volume registered with the image (see  
324 Section “Registration to the Allen atlas”). For each microvessel branch, the length  $L$  of the branch<sup>42</sup>, distance  
325  $D$  between its end points, and the cross-sectional area  $A$  of the vessel was recorded. The cross-sectional area  
326 was measured by taking two-dimensional cross-sectional slices of the vessel and measuring its area from  
327 those<sup>43</sup>. The effective diameter of the vessel was then determined as  $d = 2\sqrt{A/\pi}$ , tortuosity as  $L/D$ , and  
328 slenderness as  $L/d$ . Branches shorter than  $9.75 \mu\text{m}$  (equivalent to 15 pixels) and not connected to multiple  
329 other branches in both ends did not correspond to vessels and were pruned. Finally, the distance between the  
330 microvessels was quantified by calculating a distance map<sup>44</sup> where each non-vessel pixel is associated the  
331 distance to the nearest blood vessel.

332

## 333 **Uncertainty analysis**

334 The uncertainty limits were estimated using a Monte Carlo method, where the image analysis process is  
335 repeated several times with perturbed input parameters and the uncertainty limits are calculated from the  
336 distribution of the results. In order to speed up processing, uncertainty analysis was done on 58 blocks of the  
337 original volume image,  $1500^3$  pixels each, selected randomly from all anatomical regions in the brain.

338 The values of the input parameters were drawn randomly from normal distributions with means given by the  
339 values used for analyzing the whole volume image, and standard deviations of 10% of the mean, except for  
340 radiometric  $\sigma$  and threshold values where 5% and 2.5% were used, respectively. The values of the standard  
341 deviations were chosen such that the segmentation result calculated with any single parameter perturbed by  
342 two standard deviations had visibly low quality. Total of 25 iterations were made for each block, and the  
343 average relative error for each output quantity was calculated. The relative error averaged over all the blocks  
344 (separately for each reported quantity) was applied in reporting the uncertainty limits for the full volume image.

345

## 346 **Statistics**

347 Distributions of various quantities in different anatomical regions were calculated using simple statistical  
348 binning, or alternatively visualized using box plots showing the minimum, the maximum, the median, and the  
349 first and the third quartiles.

350 One-way comparisons of vessel measures among anatomical regions (or macroregions) were computed by  
351 using the non-parametric Kruskal-Wallis test. Subsequent pairwise comparisons were estimated with the  
352 Tukey post-hoc test. In all statistical tests in Figure 2 and Supplementary Figure 1, the Kruskal-Wallis test  
353 returned a p-value smaller the machine precision ( $2.16 \times 10^{-16}$ ).

354

## 355 **Software and data availability**

356 Stitching, image segmentation and analysis was performed using an in-house developed software 'pi2',  
357 available at [github.com/arttumiETTinen/pi2](https://github.com/arttumiETTinen/pi2). The software allows user-transparent distribution of the image  
358 analysis tasks on a computer cluster. We used a heterogeneous cluster with 10-30 available compute nodes,  
359 each equipped with 24-36 Intel Xeon cores and 180 GiB of random-access memory available to the analysis  
360 software. Depending on the availability of the resources, the analysis of the whole volume image takes  
361 approximately 5-10 days.

362 Registration with Allen atlas was done manually using the 3D Slicer software<sup>45</sup> available at [www.slicer.org](http://www.slicer.org),  
363 employing Transform, Landmark Registration, and Resample Image modules.

364 The visualizations and the supplementary animations were generated with MeVisLab, ImageJ<sup>46</sup>, Blender,  
365 Inkscape, and Gimp, available at [www.mevislab.de](http://www.mevislab.de), [imagej.nih.gov/ij/](http://imagej.nih.gov/ij/), [www.blender.org](http://www.blender.org), [inkscape.org](http://inkscape.org), and  
366 [www.gimp.org](http://www.gimp.org), respectively. The statistical analysis was done in the R environment ([www.r-project.org](http://www.r-project.org)).

367 The image data and image analysis code is available at the PSI data repository<sup>1</sup>. The supplementary animations  
368 are available at YouTube<sup>2</sup>.

369

370

371

372

## 373 **Acknowledgements**

374 This work was supported by Swiss National Science Foundation Grants CR23I2-135550 and 310030-153468.  
375 The authors acknowledge Bruno Weber and Ladina Hösli for providing laboratory resources for sample  
376 preparation.

377

## 378 **Author contributions**

379 A.M. and A.G.Z. developed the image analysis methods, performed statistical analysis, created figures and  
380 supplementary visualizations and wrote the manuscript. A.P., S.H.S and A.B. developed sample preparation  
381 and imaging protocols and performed the CT experiments. M.S. and G.E.M.B supervised the project. All the  
382 authors participated in the finalization of the manuscript.

383

## 384 **Competing Interests statement**

385 The authors have no competing interests

386

---

<sup>1</sup> <https://doi.org/10.16907/1237d208-9057-4755-8049-40ee7a199b15>

<sup>2</sup> [www.youtube.com/channel/UCPKtwMW6rfirNPHRNwNa\\_0A](https://www.youtube.com/channel/UCPKtwMW6rfirNPHRNwNa_0A)

387 **References**

- 388 1. Harris, J. J., Jolivet, R. & Attwell, D. Synaptic Energy Use and Supply. *Neuron* **75**, 762–777 (2012).
- 389 2. Perdikaris, P., Grinberg, L. & Karniadakis, G. E. Multiscale modeling and simulation of brain blood  
390 flow. *Phys. fluids* **28**, 021304 (2016).
- 391 3. Feigin, V. L. *et al.* Global and regional burden of stroke during 1990-2010: findings from the Global  
392 Burden of Disease Study 2010. *Lancet (London, England)* **383**, 245–54 (2014).
- 393 4. Boero, J. A., Ascher, J., Arregui, A., Rovainen, C. & Woolsey, T. A. Increased brain capillaries in  
394 chronic hypoxia. *J. Appl. Physiol.* **86**, 1211–1219 (1999).
- 395 5. Gorelick, P. B. *et al.* Vascular Contributions to Cognitive Impairment and Dementia. *Stroke* **42**,  
396 2672–2713 (2011).
- 397 6. Calabrese, E., Badea, A., Cofer, G., Qi, Y. & Johnson, G. A. A Diffusion MRI Tractography  
398 Connectome of the Mouse Brain and Comparison with Neuronal Tracer Data. *Cereb. Cortex* **25**,  
399 4628–4637 (2015).
- 400 7. Todorov, M. I. *et al.* Machine learning analysis of whole mouse brain vasculature. *Nature Methods*  
401 **17**, 442–449 (2020).
- 402 8. Gao, R. *et al.* Cortical column and whole-brain imaging with molecular contrast and nanoscale  
403 resolution. *Science (80-. )*. **363**, (2019).
- 404 9. Lugo-Hernandez, E. *et al.* 3D visualization and quantification of microvessels in the whole ischemic  
405 mouse brain using solvent-based clearing and light sheet microscopy. *J. Cereb. Blood Flow Metab.*  
406 **37**, 3355–3367 (2017).
- 407 10. Pan, C. *et al.* Shrinkage-mediated imaging of entire organs and organisms using uDISCO. *Nat.*  
408 *Methods* **13**, 859–867 (2016).
- 409 11. Baek, K. *et al.* Quantitative assessment of regional variation in tissue clearing efficiency using optical  
410 coherence tomography (OCT) and magnetic resonance imaging (MRI): A feasibility study. *Sci. Rep.*  
411 **9**, 2923 (2019).
- 412 12. Dyer, E. L. *et al.* Quantifying Mesoscale Neuroanatomy Using X-Ray Microtomography. *eNeuro* **4**,  
413 ENEURO.0195-17.2017 (2017).
- 414 13. Mokso, R. *et al.* Following Dynamic Processes by X-ray Tomographic Microscopy with Sub-second  
415 Temporal Resolution. in *AIP Conference Proceedings* **1365**, 38–41 (American Institute of Physics,  
416 2011).
- 417 14. Vescovi, R. *et al.* Tomosaic : efficient acquisition and reconstruction of teravoxel tomography data  
418 using limited-size synchrotron X-ray beams. *J. Synchrotron Radiat.* **25**, 1478–1489 (2018).
- 419 15. Miettinen, A., Oikonomidis, I. V., Bonnin, A. & Stampanoni, M. NRStitcher: non-rigid stitching of  
420 terapixel-scale volumetric images. *Bioinformatics* (2019). doi:10.1093/bioinformatics/btz423
- 421 16. Shi, S. *et al.* 3D digital anatomic angioarchitecture of the mouse brain using synchrotron-radiation-  
422 based propagation phase-contrast imaging. *J. Synchrotron Radiat.* **26**, 1742–1750 (2019).
- 423 17. Bednarz, T. *et al.* Cloud Based Toolbox for Image Analysis, Processing and Reconstruction Tasks. in  
424 191–205 (2015). doi:10.1007/978-3-319-10984-8\_11

- 425 18. Rex, D. E., Ma, J. Q. & Toga, A. W. The LONI Pipeline Processing Environment. *Neuroimage* **19**,  
426 1033–48 (2003).
- 427 19. Xue, S. *et al.* Indian-Ink Perfusion Based Method for Reconstructing Continuous Vascular Networks  
428 in Whole Mouse Brain. *PLoS One* **9**, e88067 (2014).
- 429 20. Lein, E. S. *et al.* Genome-wide atlas of gene expression in the adult mouse brain. *Nature* **445**, 168–  
430 176 (2007).
- 431 21. Patera, A., Zippo, A. G., Bonnin, A., Stampanoni, M. & Biella, G. E. M. Brain micro-vasculature  
432 imaging: An unsupervised deep learning algorithm for segmenting mouse brain volume probed by  
433 high-resolution phase-contrast X-ray tomography. *Int. J. Imaging Syst. Technol.* ima.22520 (2020).  
434 doi:10.1002/ima.22520
- 435 22. Zhang, L.-Y. *et al.* CLARITY for High-resolution Imaging and Quantification of Vasculature in the  
436 Whole Mouse Brain. *Aging Dis.* **9**, 262 (2018).
- 437 23. Di Giovanna, A. P. *et al.* Whole-Brain Vasculature Reconstruction at the Single Capillary Level. *Sci.*  
438 *Rep.* **8**, 12573 (2018).
- 439 24. Steinman, J., Koletar, M. M., Stefanovic, B. & Sled, J. G. 3D morphological analysis of the mouse  
440 cerebral vasculature: Comparison of in vivo and ex vivo methods. *PLoS One* **12**, e0186676 (2017).
- 441 25. Gould, I. G., Tsai, P., Kleinfeld, D. & Linninger, A. The capillary bed offers the largest  
442 hemodynamic resistance to the cortical blood supply. *J. Cereb. Blood Flow Metab.* **37**, 52–68 (2017).
- 443 26. Han, H.-C. Twisted blood vessels: symptoms, etiology and biomechanical mechanisms. *J. Vasc. Res.*  
444 **49**, 185–97 (2012).
- 445 27. Baker, K. A., Fishburn, P. C. & Roberts, F. S. Partial orders of dimension 2. *Networks* **2**, 11–28  
446 (1972).
- 447 28. Keller, D., Erö, C. & Markram, H. Cell densities in the mouse brain: A systematic review. *Frontiers*  
448 *in Neuroanatomy* **12**, (2018).
- 449 29. Erö, C., Gewaltig, M.-O., Keller, D. & Markram, H. A Cell Atlas for the Mouse Brain. *Front.*  
450 *Neuroinform.* **12**, (2018).
- 451 30. Belanger, M., Allaman, I. & Magistretti, P. J. Brain energy metabolism: focus on astrocyte-neuron  
452 metabolic cooperation. *Cell Metab.* **14**, 724–738 (2011).
- 453 31. Harris, J. J. & Attwell, D. The Energetics of CNS White Matter. *J. Neurosci.* **32**, 356–371 (2012).
- 454 32. Fünfschilling, U. *et al.* Glycolytic oligodendrocytes maintain myelin and long-term axonal integrity.  
455 *Nature* **485**, 517–521 (2012).
- 456 33. Lee, Y. *et al.* Oligodendroglia metabolically support axons and contribute to neurodegeneration.  
457 *Nature* **487**, 443–448 (2012).
- 458 34. Bouter, C. & Bouter, Y. 18F-FDG-PET in Mouse Models of Alzheimer’s Disease. *Front. Med.* **6**,  
459 (2019).
- 460 35. Mattila, K. *et al.* A prospect for computing in porous materials research: Very large fluid flow  
461 simulations. *J. Comput. Sci.* **12**, 62–76 (2016).
- 462 36. Reichold, J. *et al.* Vascular Graph Model to Simulate the Cerebral Blood Flow in Realistic Vascular  
463 Networks. *J. Cereb. Blood Flow Metab.* **29**, 1429–1443 (2009).

- 464 37. Marone, F. & Stampanoni, M. Regridding reconstruction algorithm for real-time tomographic  
465 imaging. *J. Synchrotron Radiat.* **19**, 1029–1037 (2012).
- 466 38. Paganin, D., Mayo, S. C., Gureyev, T. E., Miller, P. R. & Wilkins, S. W. Simultaneous phase and  
467 amplitude extraction from a single defocused image of a homogeneous object. *J. Microsc.* **206**, 33–40  
468 (2002).
- 469 39. Tomasi, C. & Manduchi, R. Bilateral filtering for gray and color images. in *Sixth International*  
470 *Conference on Computer Vision (IEEE Cat. No.98CH36271)* 839–846 (Narosa Publishing House).  
471 doi:10.1109/ICCV.1998.710815
- 472 40. Banterle, F., Corsini, M., Cignoni, P. & Scopigno, R. A Low-Memory, Straightforward and Fast  
473 Bilateral Filter Through Subsampling in Spatial Domain. *Comput. Graph. Forum* **31**, 19–32 (2012).
- 474 41. Lee, T. C., Kashyap, R. L. & Chu, C. N. Building Skeleton Models via 3-D Medial Surface Axis  
475 Thinning Algorithms. *CVGIP Graph. Model. Image Process.* **56**, 462–478 (1994).
- 476 42. Suhadolnik, A., Petrišič, J. & Kosel, F. An anchored discrete convolution algorithm for measuring  
477 length in digital images. *Measurement* **42**, 1112–1117 (2009).
- 478 43. Miettinen, A. *et al.* Non-destructive automatic determination of aspect ratio and cross-sectional  
479 properties of fibres. *Compos. Part A Appl. Sci. Manuf.* **77**, 188–194 (2015).
- 480 44. Maurer, C. R., Rensheng Qi & Raghavan, V. A linear time algorithm for computing exact Euclidean  
481 distance transforms of binary images in arbitrary dimensions. *IEEE Trans. Pattern Anal. Mach. Intell.*  
482 **25**, 265–270 (2003).
- 483 45. Kikinis, R., Pieper, S. D. & Vosburgh, K. G. 3D Slicer: A Platform for Subject-Specific Image  
484 Analysis, Visualization, and Clinical Support. in *Intraoperative Imaging and Image-Guided Therapy*  
485 277–289 (Springer New York, 2014). doi:10.1007/978-1-4614-7657-3\_19
- 486 46. Schneider, C. A., Rasband, W. S. & Eliceiri, K. W. NIH Image to ImageJ: 25 years of image analysis.  
487 *Nat. Methods* **9**, 671–5 (2012).
- 488
- 489
- 490

491 **Figure 1.**

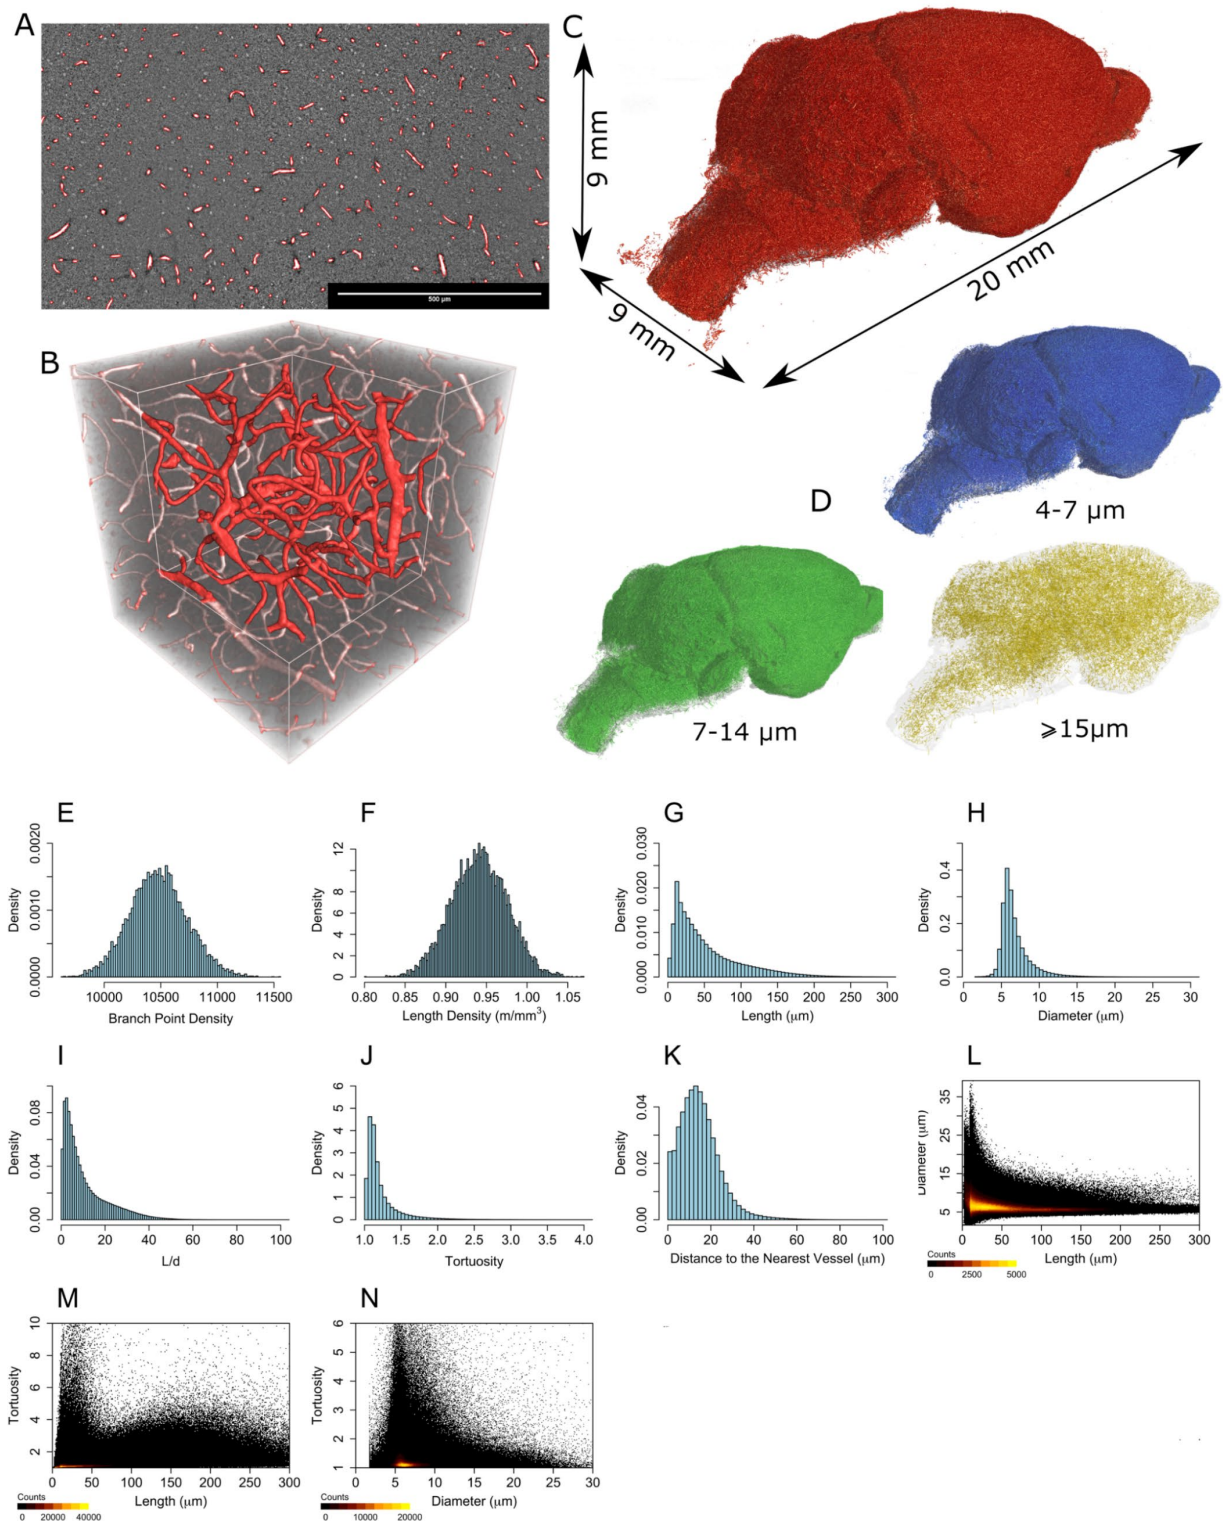

492

493 Visualizations of the segmented vessels (A-D) and uni- and bivariate distributions of various quantities  
 494 measured from the segmented vessel data (E-N). A) Edges of segmented regions drawn as red outlines on top  
 495 of a small part of the original non-segmented volume image. B) Visualization of the segmented vessels (red  
 496 shade) overlaid on top of semi-transparent non-segmented data (grayscale). A volume of  $325 \mu\text{m} \times 325 \mu\text{m} \times$   
 497  $325 \mu\text{m}$  is shown, and the corner nearest to the viewer has been cut away from the non-segmented data. C)  
 498 Visualization of blood vessels in the whole tomographic image. D) Visualizations of blood vessels in specific  
 499 diameter ranges.

500 **Figure 2.**  
501

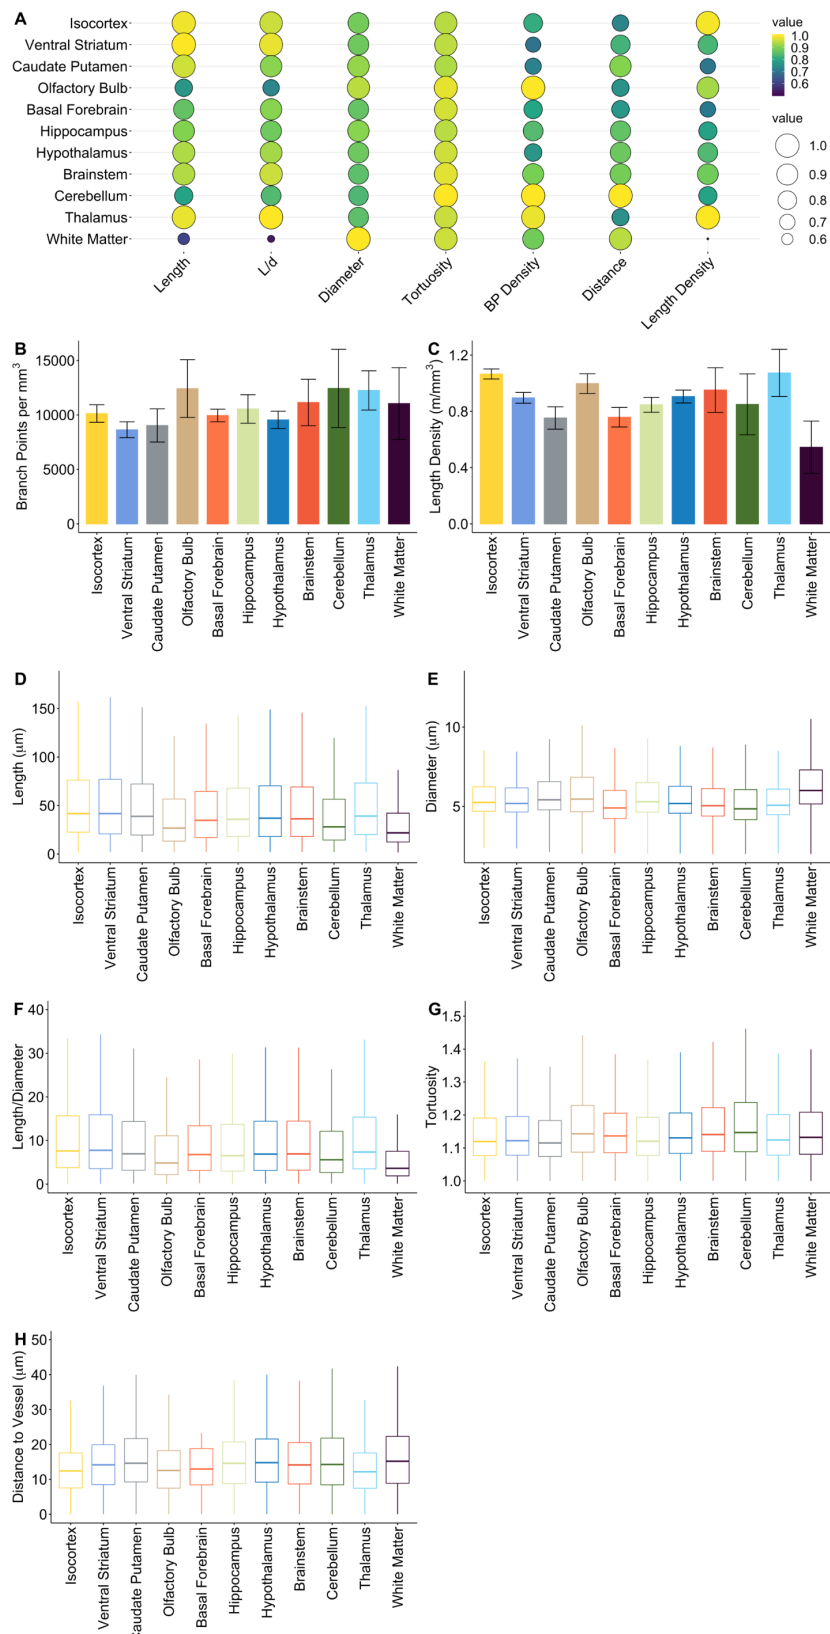

502

503 A) Bubble plot showing correlations between various measured quantities in different anatomical  
504 macromodels. B-H) Values of various measured quantities in different anatomical macromodels. In B and C  
505 the error limits describe uncertainty caused by the image analysis process.

506 **Figure 3.**

507

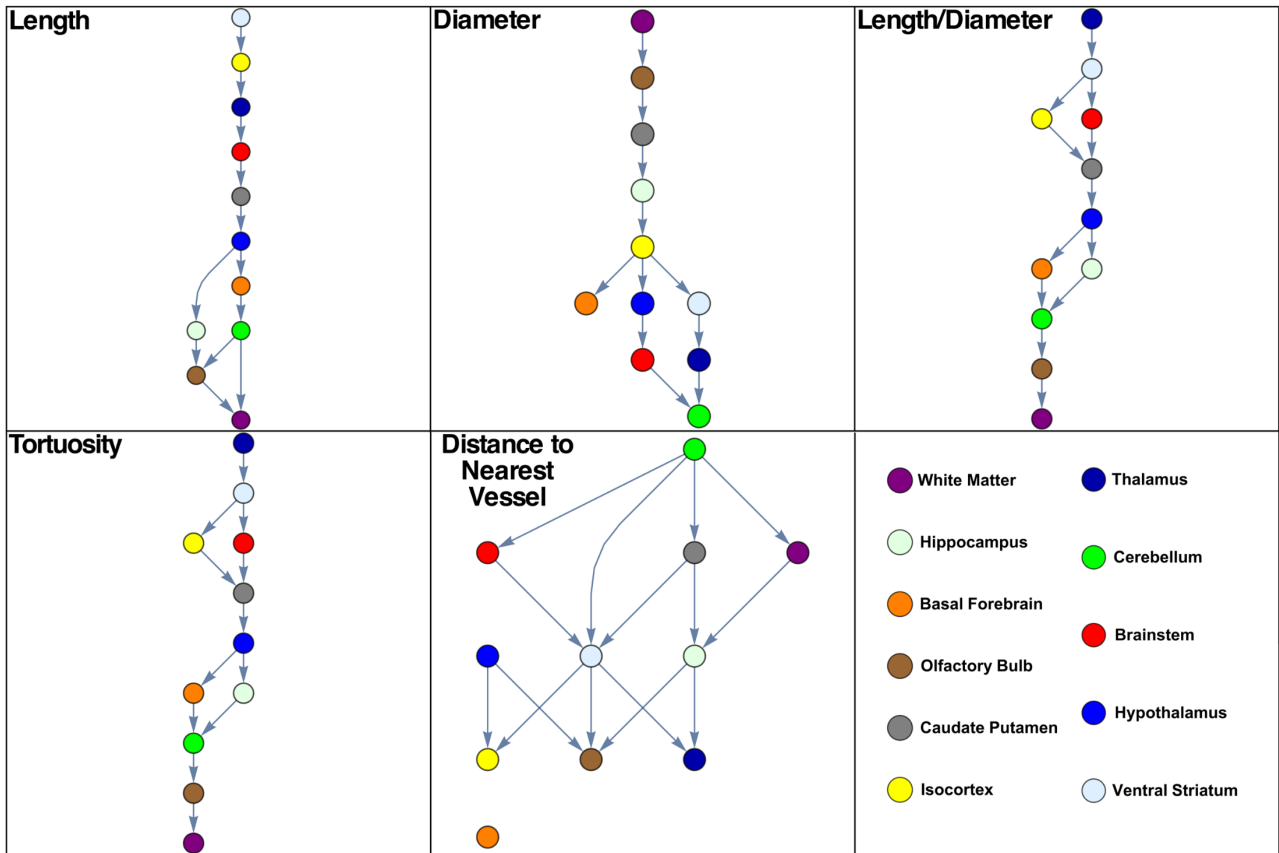

508

509 Hasse diagrams showing statistically significant differences in the different macroregions and different  
 510 quantities. The regions are placed on different levels if the difference in the corresponding quantity is  
 511 significant between the regions. The topmost levels correspond to the largest values of the quantities.  
 512



513 **Figure 4.**

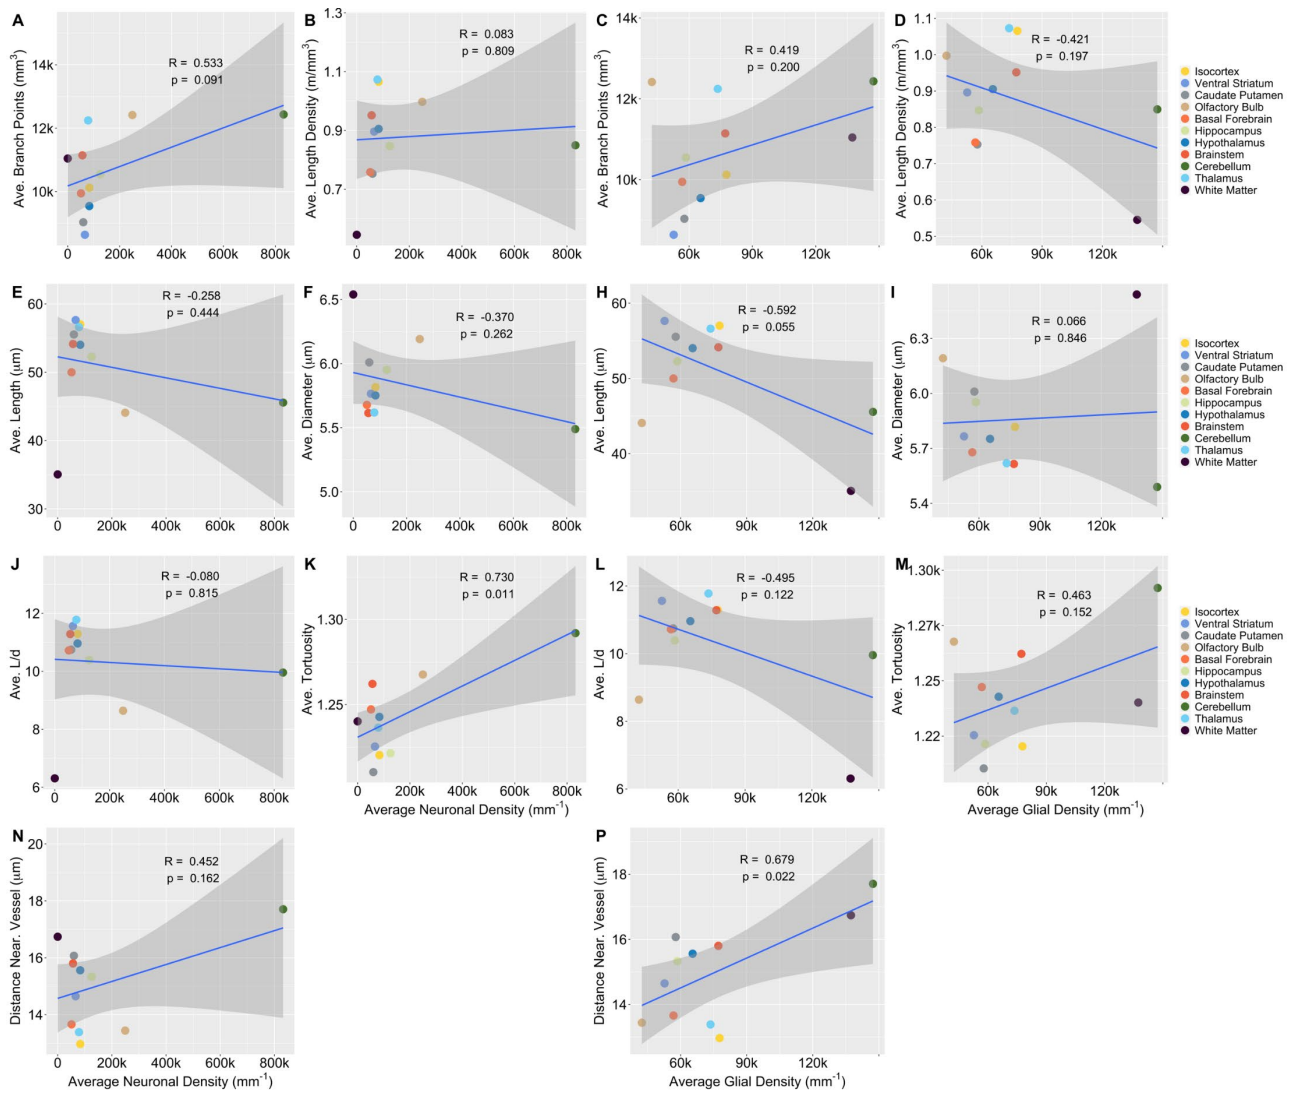

514

515

516 Correlations between average neuronal (first and second column) and glial (third and fourth column) densities  
 517 and various measured quantities. Density data is from the EPFL mouse brain atlas<sup>28</sup>. Ave., average; Near.,  
 518 nearest.  
 519

520 **Supplementary material**

521

522 **Supplementary Table 1.**

523 Confusion table for segmentation quality. The table was compiled by manually comparing the segmented  
524 image to the original in 2000 random locations.

|                 |            | Actual class       |                     |                     |
|-----------------|------------|--------------------|---------------------|---------------------|
|                 |            | Vessel             | Not vessel          | Total               |
| Predicted class | Vessel     | <b>279</b> (14.0%) | <b>6</b> (0.3%)     | <b>285</b> (14.3%)  |
|                 | Not vessel | <b>17</b> (0.9%)   | <b>1698</b> (84.9%) | <b>1715</b> (85.8%) |
|                 | Total      | <b>296</b> (14.8%) | <b>1704</b> (85.2%) | <b>2000</b> (100%)  |

525

526 **Supplementary Table 2.**

527 Allen atlas regions corresponding to the coarse (macroregions) and fine level (regions) clustering.

528

| <b>Fine level Atlas region clustering</b> | <b>Coarse level Atlas region clustering</b> |
|-------------------------------------------|---------------------------------------------|
| Gustatory areas                           | Isocortex                                   |
| Prelimbic area                            |                                             |
| Frontal pole                              |                                             |
| Orbital area                              |                                             |
| Visceral area                             |                                             |
| Perirhinal area                           |                                             |
| Agranular insular area                    |                                             |
| Infralimbic area                          |                                             |
| Temporal association area                 |                                             |
| Posterior parietal association area       |                                             |
| Ectorhinal area                           |                                             |
| Anterior cingulate areas                  |                                             |
| Somatomotor areas                         |                                             |
| Somatosensory areas                       |                                             |
| Visual areas                              |                                             |
| Auditory areas                            |                                             |
| Retrosplenial area                        |                                             |
| Piriform area                             |                                             |
| Striatum                                  | Ventral Striatum                            |
| Dorsal peduncular area                    |                                             |
| Pallidum                                  |                                             |
| Cortical subplate                         | Caudate Putamen                             |
| Cortical amygdalar area                   |                                             |
| Piriform-amygdalar area                   |                                             |
| Postpiriform transition area              |                                             |
| Accessory olfactory bulb                  | Olfactory Bulb                              |
| Anterior olfactory nucleus                |                                             |
| Main olfactory bulb                       |                                             |
| Lateral olfactory tract nucleus           | Basal Forebrain                             |
| Taenia tecta                              | Hippocampus                                 |
| Hippocampal formation                     |                                             |
| Hypothalamus                              | Hypothalamus                                |
| Midbrain                                  | Brainstem                                   |
| Pons                                      |                                             |
| Medulla                                   |                                             |
| Cerebellum                                | Cerebellum                                  |
| Dorsal thalamus                           | Thalamus                                    |
| Ventral thalamus                          |                                             |
| Posterior thalamus                        |                                             |
| Anterior thalamus                         |                                             |
| Extrapyramidal tract                      | White Matter                                |
| Corpus callosum                           |                                             |
| Corticospinal tract                       |                                             |
| Optic nerve                               |                                             |

529

530

531 **Supplementary figure 1**

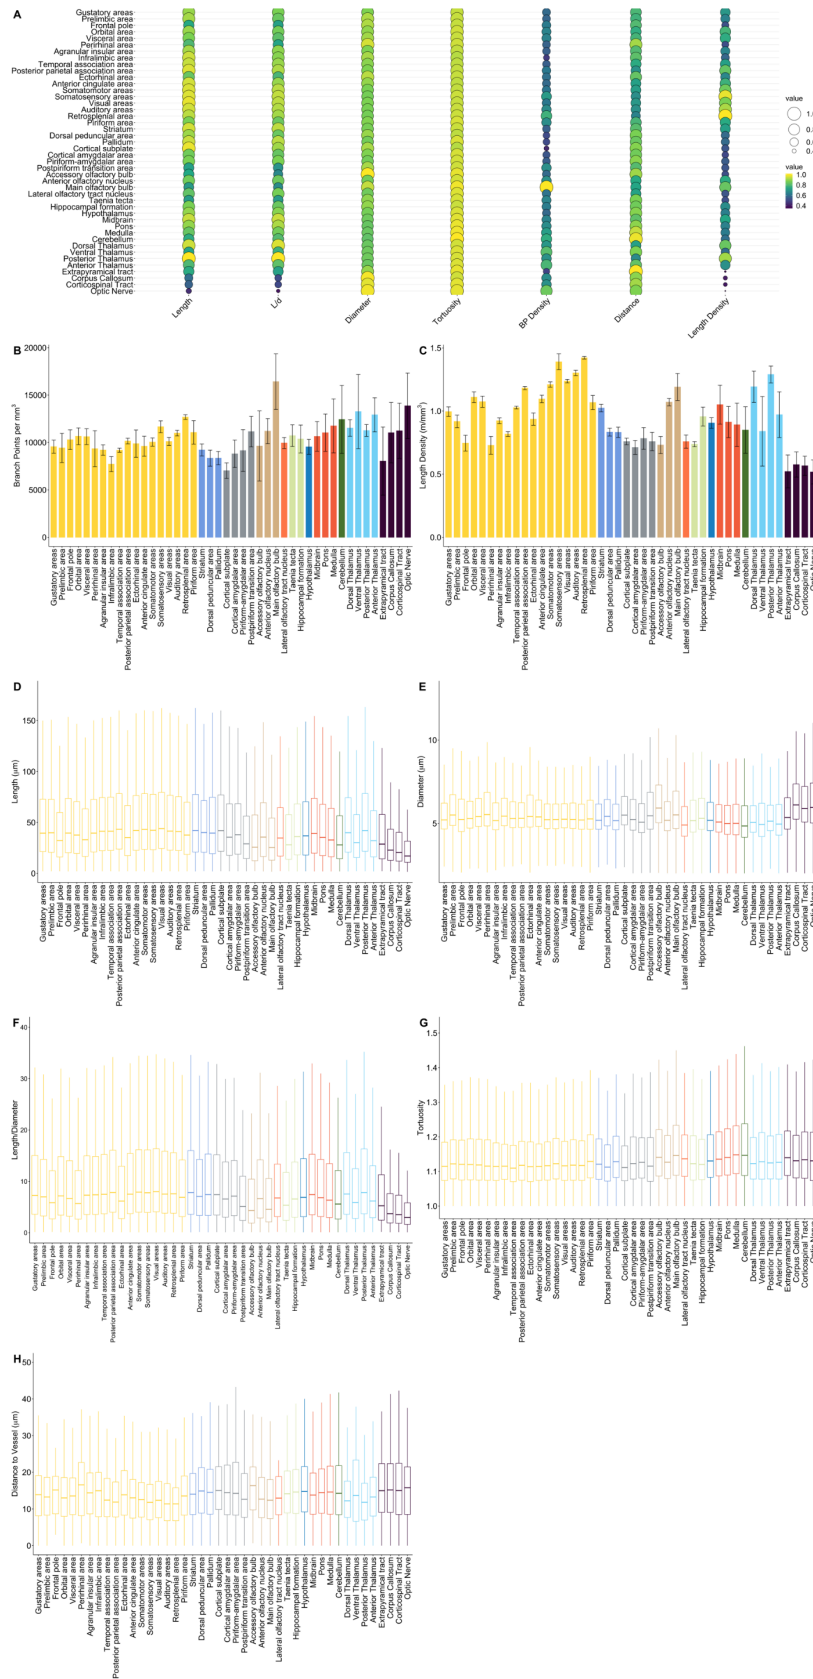

532

533 A) Bubble plot showing correlations between various measured quantities in different anatomical regions. B-  
 534 H) Values of various measured quantities in different anatomical regions. In B and C the error limits describe  
 535 uncertainty caused by the image analysis process.

536 **Supplementary figure 2**

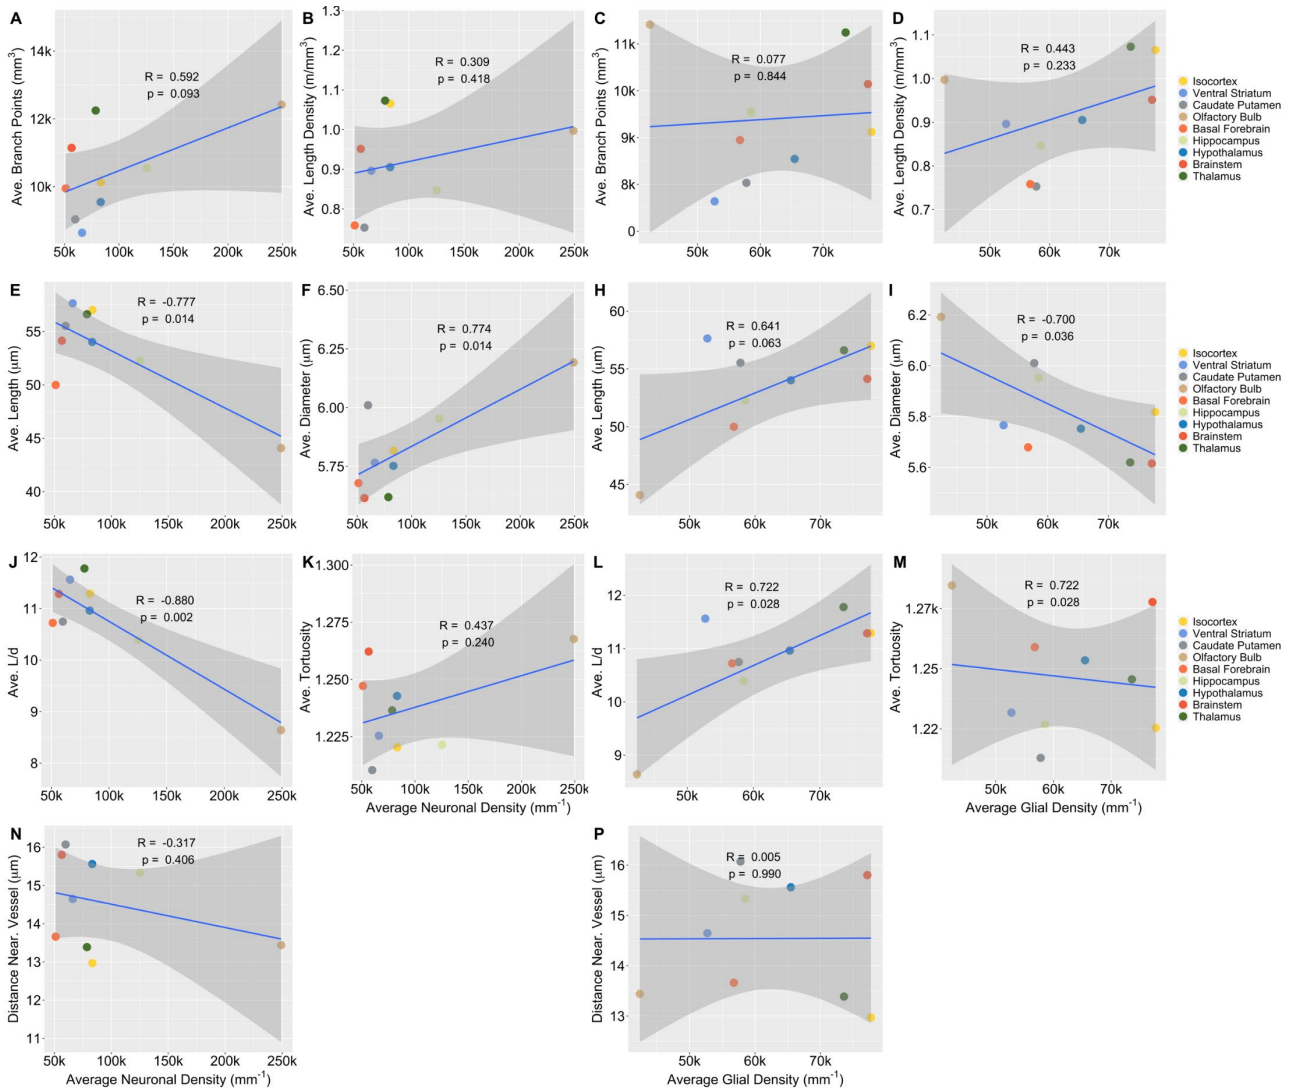

537

538 Correlation analyses between neural (first and second column) and glial (third and fourth column) densities  
 539 and vessel measures as in Figure 4 but excluding the two outlier macroregions, the white matter and the  
 540 cerebellum.

541

542 **Supplementary file 1**

543 Regional average differences and post-hoc statistics (Tukey test) of the vascular features for macroregional  
 544 and regional comparisons.

545

546 **Supplementary animation 1**

547 Supplementary animation 1 is a visualization of the microvessels in the whole mouse brain as a maximum  
 548 intensity projection of the original (non-segmented) volume image. The animation begins from a view where  
 549 the whole brain is visible and zooms in until the individual microvessels are well visible.

550 Available at <https://www.youtube.com/watch?v=gbXkBWnqBs8>.

551 **Supplementary animation 2**

552 Supplementary animation 2 visualizes the performance of the proposed segmentation pipeline. The edges of  
553 the segmented microvessels are drawn with red color over a slice through the original volume image. The  
554 animation begins from an arbitrary location inside the cerebrum and proceeds towards the cerebellum with a  
555 speed of 13  $\mu\text{m/s}$ .

556 Available at <https://www.youtube.com/watch?v=6mdv0gB1drE>

557 **Supplementary animation 3**

558 Supplementary animation 3 shows a 3D visualization of the segmented vessel network.

559 Available at <https://www.youtube.com/watch?v=2Znl3indW-8>.

560 **Supplementary animations 4-11**

561 Supplementary animations 4-11 visualize spatial variations in the measured quantities between anatomical  
562 macroregions.

563

|           | <b>Title</b>               | <b>Available at</b>                                                                                   |
|-----------|----------------------------|-------------------------------------------------------------------------------------------------------|
| <b>4</b>  | Overview                   | <a href="https://www.youtube.com/watch?v=4hhurq0Fwx0">https://www.youtube.com/watch?v=4hhurq0Fwx0</a> |
| <b>5</b>  | Length density             | <a href="https://www.youtube.com/watch?v=u7fjgwx2pbo">https://www.youtube.com/watch?v=u7fjgwx2pbo</a> |
| <b>6</b>  | Bifurcation density        | <a href="https://www.youtube.com/watch?v=sBXUp0d30WE">https://www.youtube.com/watch?v=sBXUp0d30WE</a> |
| <b>7</b>  | Branch length              | <a href="https://www.youtube.com/watch?v=0eMp2ZGZc6M">https://www.youtube.com/watch?v=0eMp2ZGZc6M</a> |
| <b>8</b>  | Length/diameter ratio      | <a href="https://www.youtube.com/watch?v=6cLs_9G8rXk">https://www.youtube.com/watch?v=6cLs_9G8rXk</a> |
| <b>9</b>  | Distance to nearest vessel | <a href="https://www.youtube.com/watch?v=si4qJ-aO1sw">https://www.youtube.com/watch?v=si4qJ-aO1sw</a> |
| <b>10</b> | Vessel diameter            | <a href="https://www.youtube.com/watch?v=NVKx1mkqzII">https://www.youtube.com/watch?v=NVKx1mkqzII</a> |
| <b>11</b> | Tortuosity                 | <a href="https://www.youtube.com/watch?v=R92zNhzcSvw">https://www.youtube.com/watch?v=R92zNhzcSvw</a> |

564
